# Supplementary material
Source: publisher figshare collection journal article supplement (https://acs.figshare.com/ndownloader/files/10749073)
Supplement: Supplementary file 1 [file 10749073]

Supporting information for:

## **Low-Cost Synthesis of Highly Luminescent Colloidal Lead Halide Perovskite Nanocrystals by Wet Ball Milling**

*Loredana Protesescu,<sup>†,‡,\*</sup> Sergii Yakunin,<sup>†,‡</sup> Olga Nazarenko,<sup>†,‡</sup> Dmitry N. Dirin,<sup>†,‡</sup> and Maksym V. Kovalenko<sup>†,‡,\*</sup>*

<sup>†</sup> Institute of Inorganic Chemistry, Department of Chemistry and Applied Bioscience, ETH Zürich, Vladimir Prelog Weg 1, CH-8093 Zürich, Switzerland

<sup>‡</sup> Laboratory for Thin Films and Photovoltaics, Empa – Swiss Federal Laboratories for Materials Science and Technology, Überlandstrasse 129, CH-8600 Dübendorf, Switzerland

\*mvkovalenko@ethz.ch

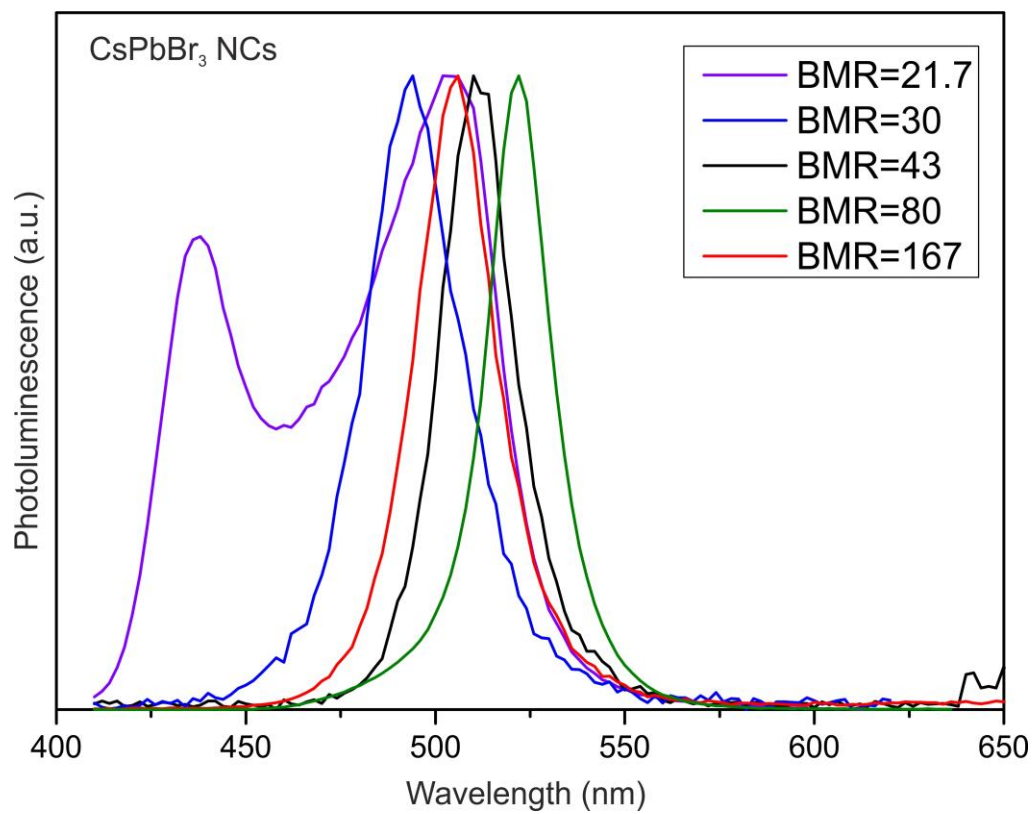

**Figure S1.** Experiments with balls-to-materials weight ratios (BMR) ranging from 21.7 to 167 in the synthesis of CsPbBr<sub>3</sub> NCs by wet ball milling.

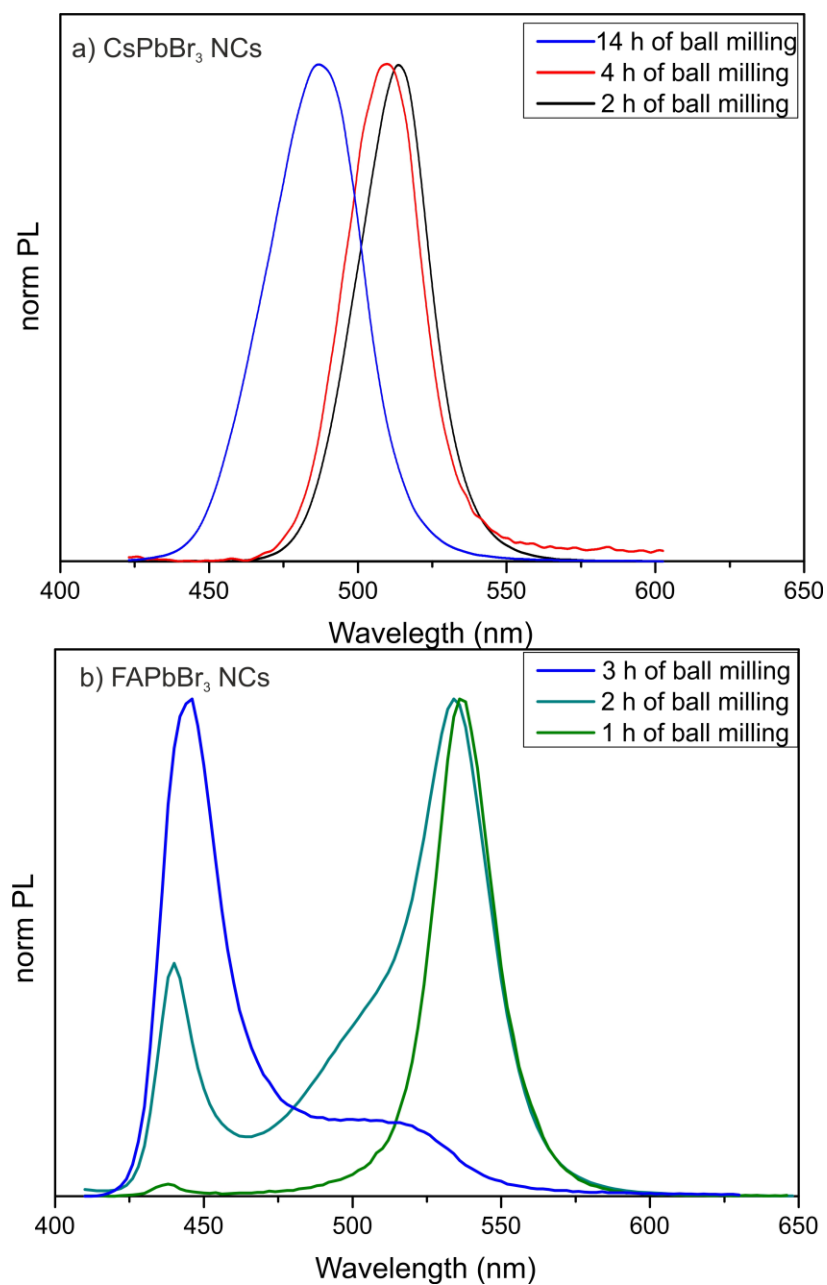

**Figure S2.** The effect of milling time for on the formation of (a) CsPbBr<sub>3</sub> NCs and (b) FAPbBr<sub>3</sub> NCs by wet ball milling using ball-to-material mass ratio of 80, mestylene as a solvent and oleylammonium bromide as a ligand.

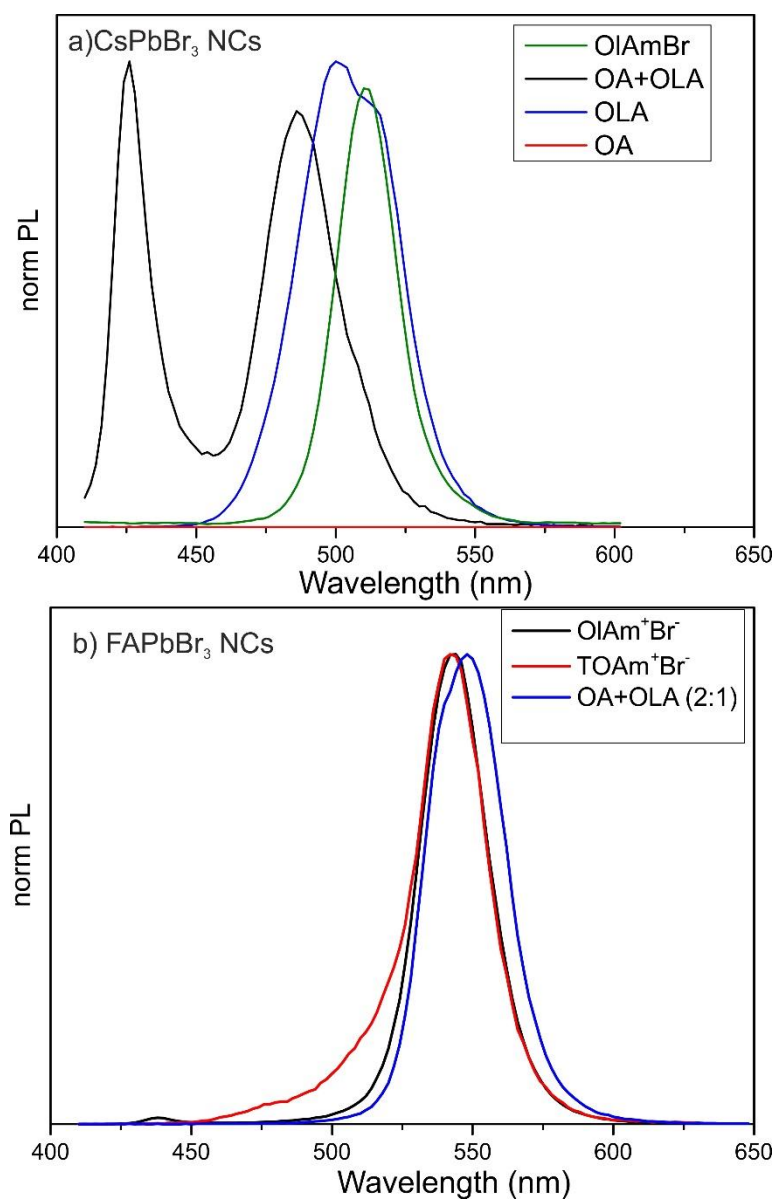

**Figure S3.** The effect of the used ligand systems on the outcome of the synthesis of (a) CsPbBr<sub>3</sub> NCs and (b) FAPbBr<sub>3</sub> NCs by wet ball milling.

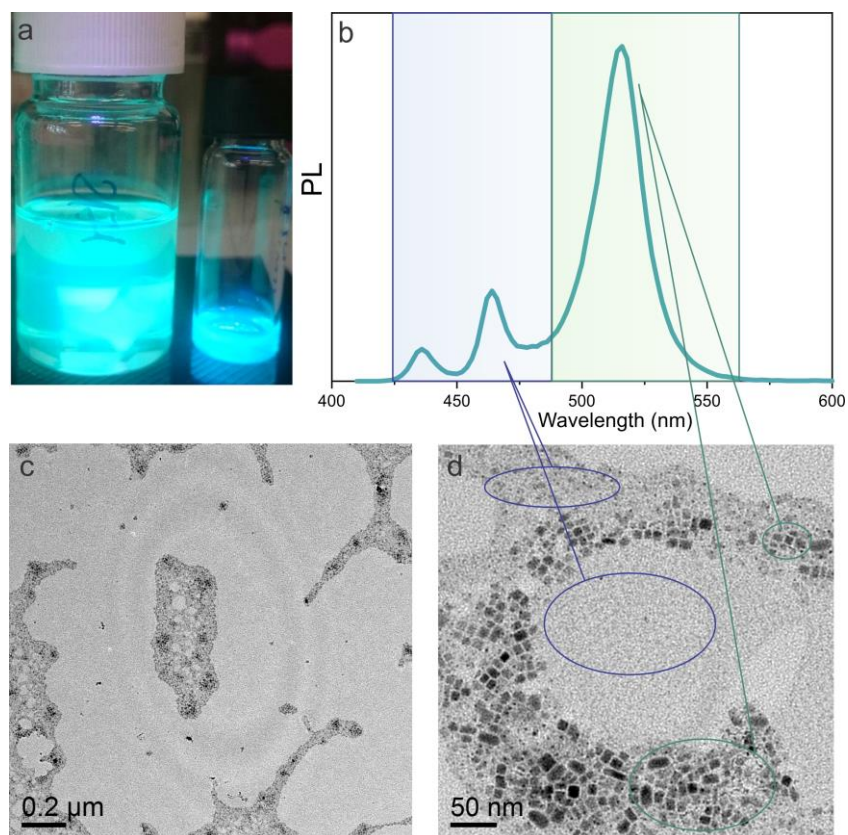

**Figure S4.** (a) Photograph of the product after 21 h of ball milling; under UV lamp. (b) the corresponding PL emission showing two peaks corresponding to  $\text{CsPbBr}_3$  NPLs and (the most intense) to  $\text{CsPbBr}_3$  NCs; (c) and (d) TEM images showing both  $\text{CsPbBr}_3$  NCs and NPLs morphologies.

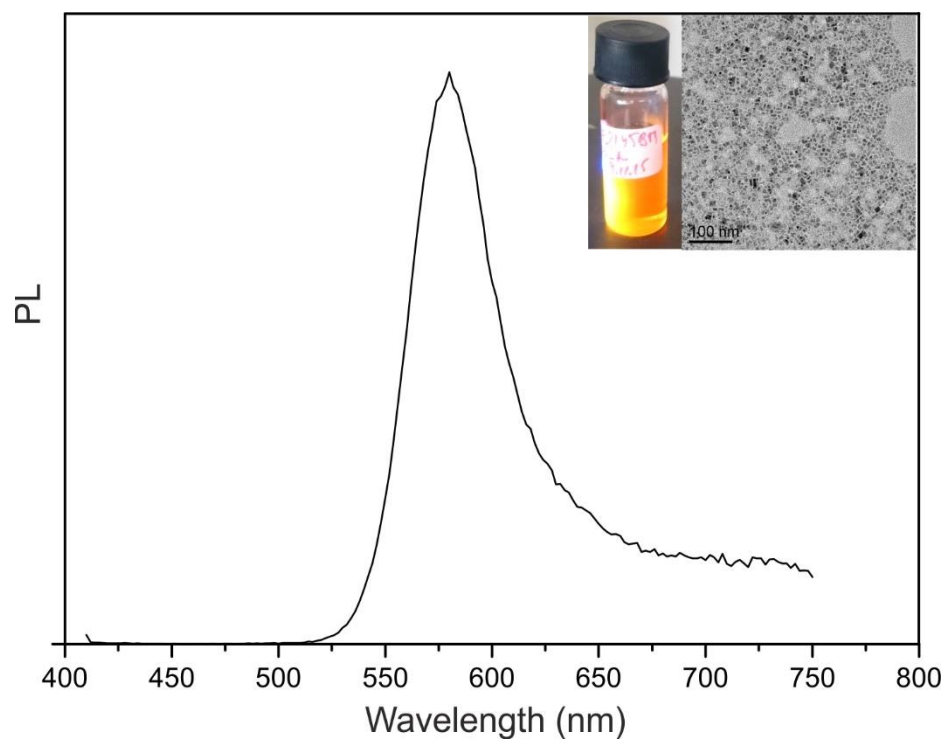

**Figure S5.** MAPbI<sub>3</sub> NCs obtained with wet ball-milling method.
